# Supplementary material for: Cbl upregulates cysH for hydrogen sulfide production in Aeromonas veronii
Source: PeerJ. 2021 Sep 9;9:e12058. doi: 10.7717/peerj.12058 (PMC8435198; doi:10.7717/peerj.12058)
Supplement: Supplemental Information 3 [file peerj-09-12058-s003.xlsx]

## Sheet: Sheet1
Raw data
The relative expression of the correlated H2S synthesis genes in WT and ΔsmpB cells
Genes	WT			ΔsmpB
cysC	9.22	11.35	12.88	51.88	41.38	46.86
cysD	23.31	51.88	36.63	177.86	203.03	207.34
cysN	16.41	30.62	12.77	131.85	155.96	163.79
cysI	34.35	58.64	43.6	160.07	147.8	147.02
cysJ	50.06	97.79	57.51	264.41	318.32	314.33
cysH	21.75	40.21	24.96	195.94	249.52	253.24
cbl	7.04	10.06	6.71	26.07	26.03	28.52
H2S production was measured by Pb(Ac)2-soaked paper strips
Time	WT			Δcbl			Δcbl-pcbl			(cm)
6	0	0	0	0	0	0	0	0	0
12	4.8	5.1	4.8	1.2	2.1	1.7	3.7	5.3	4.2
24	10.8	11.1	10.8	7.2	8.1	7.7	9.7	11.3	10.2
36	11.3	12.2	10.8	8.5	8.5	7.9	11.7	12	11.6
48	11.3	12.2	10.8	8.5	8.5	7.9	11.7	12	11.6
Time	WT			Δcbl			Δcbl-pcbl			(ug/L)
0	0	0	0	0	0	0	0	0	0
6	0	0	0	0	0	0	0	0	0
12	384	408	384	96	168	136	296	424	336
24	864	888	864	576	648	616	776	904	816
36	904	976	864	680	680	632	936	960	928
48	904	976	864	680	680	632	936	960	928
Fluorescence intensities were detected by Synergy H1 (BioTek) after the tested strains were treated with fluorescent H2S probe
Time	WT			Δcbl			Δcbl-pcbl			(RFU/OD600)
24	10524.4	11552.5	11263.3	8121.9	7797.37	9335.63	13167.2	12582.5	12542.1
The relative expressions of H2S synthesis genes were detected by qRT-PCR
Genes	WT			Δcbl			Δcbl-pcbl
cysH	0.869944	0.911087	1.21897	0.718135	0.644236	0.481518	0.878021	0.956384	1.11651
cysJ	0.838123	1.05597	1.10591	0.751876	1.31212	1.06824	1.17982	0.912924	1.22708
cysI	0.867844	1.08086	1.0513	1.00615	1.21603	1.12156	1.19928	0.930132	1.1638
Fluorescence intensities were detected by Synergy H1 (BioTek). The tested strains expressed PcysIJH only (pTRG+pUC19- PcysIJH -eGFP), and co-expressed both Cbl and PcysIJH (pTRG-Cbl+pUC19- PcysIJH -eGFP), respectively.
Time	pTRG+pUC19- PcysIJH -eGFP			pTRG-Cbl+pUC19- PcysIJH -eGFP
0	0	0	0	0	0	0	(RFU/OD600)
12	967	872	1069	616	554	791
14	1145	1051	1208	771	663	812
16.5	1676	1510	1498	903	884	1075
20	1758	1584	1502	959	1003	1189
24	1659	1755	1529	1298	1394	1033
36	1832	2170	1919	1728	1508	1529
